RESEARCH ARTICLE

# Spermidine supplementation in honey bees: Autophagy and epigenetic modifications

Danijela Kojić<sup>1\*</sup>, Jelena Spremo<sup>1</sup>, Srđana ordjević<sup>1</sup>, Tatjana Čelić<sup>1</sup>, Elvira Vukašinović<sup>1</sup>, Ivan Pihler<sup>2</sup>, Jelena Purać<sup>1\*</sup>

<sup>1</sup> Faculty of Science, Department of Biology and Ecology, University of Novi Sad, Novi Sad, Serbia,

<sup>2</sup> Faculty of Agriculture, Department of Animal Sciences, University of Novi Sad, Novi Sad, Serbia

\* danijela.kojic@dbe.uns.ac.rs (DK); jelena.purac@dbe.uns.ac.rs (JP)

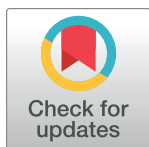

## Abstract

Polyamines (PAs), including putrescine (Put), spermidine (Spd), and spermine (Spm), are essential polycations with wide-ranging roles in cellular functions. PA levels decline with age, making exogenous PA supplementation, particularly Spd, an intriguing prospect. Previous research in honey bees demonstrated that millimolar Spd added to their diet increased lifespan and reinforced oxidative resilience. The present study is aimed to assess the anti-aging effects of spermidine supplementation at concentrations of 0.1 and 1 mM in honey bees, focusing on autophagy and associated epigenetic changes. Results showed a more pronounced effect at the lower Spd concentration, primarily in the abdomen. Spd induced site-specific histone 3 hypoacetylation at sites K18 and 27, hyperacetylation at K9, with no change at K14 in the entire body. Additionally, autophagy-related genes (*ATG3*, 5, 9, 13) and genes associated with epigenetic changes (*HDAC1*, *HDAC3*, *SIRT1*, *KAT2A*, *KAT6B*, *P300*, *DNMT1A*, *DNMT1B*) were upregulated in the abdomens of honey bees. In conclusion, our findings highlight profound epigenetic changes and autophagy promotion due to spermidine supplementation, contributing to increased honey bee longevity. Further research is needed to fully understand the precise mechanisms and the interplay between epigenetic alterations and autophagy in honey bees, underscoring the significance of autophagy as a geroprotective mechanism.

## OPEN ACCESS

**Citation:** Kojić D, Spremo J, ordjević S, Čelić T, Vukašinović E, Pihler I, et al. (2024) Spermidine supplementation in honey bees: Autophagy and epigenetic modifications. PLoS ONE 19(7): e0306430. <https://doi.org/10.1371/journal.pone.0306430>

**Editor:** David M. Ojcius, University of the Pacific, UNITED STATES

**Received:** March 1, 2024

**Accepted:** June 16, 2024

**Published:** July 1, 2024

**Copyright:** © 2024 Kojić et al. This is an open access article distributed under the terms of the [Creative Commons Attribution License](https://creativecommons.org/licenses/by/4.0/), which permits unrestricted use, distribution, and reproduction in any medium, provided the original author and source are credited.

**Data Availability Statement:** The datasets generated and/or analyzed during the current study are available in the Zenodo repository DOI: [10.5281/zenodo.10533726](https://doi.org/10.5281/zenodo.10533726).

**Funding:** This work was supported by Science Fund of the Republic of Serbia (Program IDEAS, Grant No. 7721972, Implication of dietary and endogenous polyamines for the health and longevity of honey bees-B-HEALTH) and Ministry of Science, Technological Development and Innovation of the Republic of Serbia (Grant No.

## Introduction

Polyamines (PAs), such as putrescine (Put), spermidine (Spd), and spermine (Spm), are low molecular weight polycations that are ubiquitous and essential in all living systems. PAs participate in numerous biological processes. They are important for cell growth, differentiation, and stress protection, having a role in aging, memory performance, metabolic disorders, and diseases [1–4]. As cellular polycations, PAs interact with negatively charged molecules such as DNA, RNA, and proteins. By changing the structure and stability of nucleic acids and proteins, PAs can change enzyme activity, remodel chromatin, promote binding between proteins and DNA, and regulate gene expression by modulating the rate of transcription and ribosomal-mediated translation (reviewed in [5]). Since intracellular PA concentration is critical for all

451-03-66/2024-03/ 200125 & 451-03-65/2024-03/200125). The funders had no role in study design, data collection and analysis, decision to publish, or preparation of the manuscript."

**Competing interests:** The authors have declared that no competing interests exist.

these functions, the cellular pool of PAs is tightly regulated by their biosynthesis, degradation, and transport via unusual and conserved regulatory features (reviewed in [6]). Interestingly, PAs content declines with aging, but exogenous supplies of PAs, particularly Spd, can replenish cellular PAs with beneficial effects on lifespan and health promotion in model organisms and humans [7–9] (reviewed in [10]). Spermidine has been the most studied polyamine in terms of its anti-aging effect and has recently been proposed as a longevity elixir. Spd administration extended the lifespan of yeast, flies, worms, and human immune cells, while reducing age-related oxidative damage in aging mice [9,11].

Autophagy is considered an essential mechanism for the anti-aging activity of Spd [9–12]. Moreover, the beneficial anti-aging effect of Spd is accompanied by the induction of signs of autophagy in tested model organisms [9–11]. Autophagy is the main mechanism of recycling intracellular components (usually malfunctioning and damaged proteins, cellular debris, or whole organelles) within lysosomes (reviewed in [13]). There is a complex network of autophagy regulation, but all these pathways have an effect on autophagy-related (ATG) proteins, changing their post-translational modifications or altering gene expression of these proteins (reviewed in [14]). Autophagy declines with age in various organisms and has been linked to many age-related diseases (reviewed in [15]).

There is a lack of information about cellular events linked to high Spd levels and autophagy induction. Generally, Spd alters the epigenetic landscape, which may have an impact on specific promoters and gene regions that control the transcription of genes linked with autophagy [9,10,12]. Global histone deacetylation induced by Spd administration was observed, which was ascribed to specific inhibition of histone acetyltransferases (KATs or formerly HATs) [9,12,16]. The open question is whether Spd can trigger autophagy via post-translational mechanisms that alter the acetylation of autophagic non-histone cytosolic proteins through KAT inhibition, considering that many of them are KAT substrates, including some ATG proteins and transcription factors [12,17]. Additionally, Spd, by stimulating the translocation of some histone deacetylases (HDACs) to the nucleus and preventing deacetylation of target cytosolic proteins, could promote autophagy flux as well [18]. Soda et al. [19] demonstrated that exogenous PAs increased DNA methyltransferase (DNMT) activity and reduced age-associated global alternation in DNA methylation status in old mice, suggesting that Spd may be responsible for additional epigenetic changes.

It has been shown before that Spd supplementation improved honey bee survival and average lifespan and influenced endogenous PA levels [20]. Additionally, exogenous Spd improved oxidative status and increased vitellogenin gene expression, indicating that antioxidative activity could be one of the geroprotective mechanisms of Spd in honey bees. Honey bees are an interesting organism for this type of research for at least two reasons. First, honey bees are commonly used as model organisms in aging studies because of their extreme phenotypic plasticity with regard to lifespan among closely related siblings [21,22]. Second, honey bees are one of the most important global pollinators, with a significant impact on biodiversity and the economy, yet there has been an increasing loss of managed honey bee colonies over the last few decades [23].

In this study, the objective was to investigate whether spermidine exerts its anti-aging effects in bees through the process of autophagy and the associated epigenetic changes. To address this question, the relative expression of selected genes associated with autophagy (ATG genes), histone acetylation (HDACs and KATs genes), and DNA methylation (DNMT genes) was assessed in honey bees supplemented with Spd. In addition, four epigenetic modifications of histone H3 using Western blot were analyzed.

## Materials and methods

### Honey bees collection and formation of experimental groups

The experiment was conducted in June 2022. In this study, all worker honey bees originated from a single hive from the apiary located at the Fruška Gora mountain (45°22' N; 19°53' E), near Novi Sad, Serbia. The hive was maintained by an experienced beekeeper according to good beekeeping practice [24]. The bee colony was strong (approximately 20000–30000 bees), with no clinical signs of infectious diseases. Before the experiment set-up, two frames with ready-to-emerge worker brood were collected from the apiary and placed in an incubator at 34°C and 65% humidity. After 24h brood frames were replaced with honey and bee bread frames to provide food for newly emerged honey bees, and the temperature was lowered to 28°C. After 5 days, young worker honey bees were transferred into 2 L plastic boxes, each containing approximately 30 bees. Three experimental groups were formed: control (C) and two supplemented groups ( $S_{0.1}$  and  $S_1$ ). In the control groups, honey bees were fed sucrose solution (50% w/v), while the experimental groups  $S_{0.1}$  and  $S_1$  were fed sucrose solution supplemented with 0.1 mM and 1 mM spermidine, respectively. These concentrations were selected based on a previous study of the supplementation of honey bees with a wide range of spermidine concentrations [20], as those that showed a positive effect on the survival and lifespan of honey bees. Each group included three biological replicates. Food was prepared and changed daily, and dead bees were removed. After 17 days, the bees were collected in a plastic vial, and immediately frozen with dry ice, and stored at -80°C for further analysis. According to the aforementioned study [20], the selected experiment's duration is also a time point when spermidine supplementation has a significant impact on the physiology of honey bees.

### Total RNA isolation and cDNA synthesis

For total RNA isolation from honey bees, body segments (head, thorax, and abdomen) were separated. For each biological replicate, three heads or abdomens were pooled and homogenized in a microtube with pestle with the addition of RNA Extracol (EurX). Chloroform was added and the homogenate was allowed to separate into a clear upper aqueous layer, an interphase, and a lower organic layer. RNA remains in the aqueous phase, which was transferred to clear microtube and RNA was precipitated with isopropanol. RNA precipitate was diluted in 30–50 µl of RNase/DNase-free water (Sigma-Aldrich). RNA concentration was measured at 260 nm using a BioSpec-nano spectrophotometer (Shimadzu), and the purity of total RNA was determined as the 260/280 absorbance ratio. After the estimation of purity and concentration, total RNA was diluted to 500 ng/µl and stored at -80°C. The synthesis of cDNA was carried out using the QuantiTect Reverse Transcription Kit (Qiagen) according to the manufacturer's protocol, starting with 1 µg of total RNA. In this kit, genomic DNA in RNA samples was removed using the gDNA Wipeout Buffer and reverse transcription was performed using Quantiscript Reverse Transcriptase, RT Buffer and RT Primer Mix optimized for high cDNA yield for all regions of the RNA transcripts. After reverse transcription, the obtained samples were stored at -20°C.

### Real-time PCR

Real-time PCR was used to measure the relative expression of selected genes associated with autophagy (*ATG3*, 5, 9, 13), histone deacetylases (*HDAC1*, *HDAC3*, *SIRT1*), histone acetyltransferases (*P300*, *KAT6B*, *KAT2A*), and DNA methyltransferases (*DNMT1A*, *DNMT1B*, *DNMT3*). Data about primers are listed in S1 Table. Genes for  $\beta$ -actin (*ActB*) and ribosomal protein 49 (*Rp49*) were used as an endogenous control. The suitability of these genes, as an endogenous control in relative gene expression analysis, has previously been confirmed [25].

PCR reaction mix consisted of 7  $\mu$ l of 2 $\times$ SYBR Green PCR Master Mix (Applied Biosystems), 500 nM of each primer, and 40 ng cDNA in a total volume of 14  $\mu$ l. Quantitative PCR on the cDNA products was carried out using MasterCycler RealPlex4 (Eppendorf). Amplification program included initial preincubation at 95°C (10 min) and 40 cycles of 95°C (15 sec) and 60°C (1 min), with an additional step for melting curve analysis to confirm amplification of a single gene product.

### Western blot, quantification of histone acetylation

For Western blot analysis, histones were extracted from whole bees (three bees from each biological replicate) using the Histone Extraction Kit (Abcam ab113476) according to the manufacturer's instructions. The concentration of total protein in extracts was quantified by Bradford method [26], using BSA as a standard. Histone extracts were separated by SDS-PAGE on 15% gel [27] with an equal amount of loaded proteins (30  $\mu$ g/well), and then transferred to a nitrocellulose membrane (2  $\mu$ m, Bio-Rad) at constant voltage (100V) for 70 min. Nonspecific binding sites were blocked by incubating membranes in 5% non-fat dry milk in TBST (20 mM TRIS, 150 mM NaCl, 0.1% Tween) for 1 h at room temperature. The membranes were then incubated overnight at 4°C with primary antibodies against total histone H3, which served as a loading control, or histone H3 acetylated at specific lysine (H3K27ac, H3K9ac, H3K18ac, H3K14ac), followed by incubation with a second goat anti-rabbit antibody conjugated with horseradish peroxidase for 1 h at room temperature. The specifications and dilution ratios of the antibodies used are listed in S2 Table. The signal was detected using an ultra-sensitive enhanced chemiluminescent substrate (SuperSignal™ West Femto Maximum Sensitivity Substrate) by myECL Imager (Thermo Scientific). The intensity of protein bands was measured using ImageJ software [28], and normalized to the band intensity of H3 as a loading control on the same blot. The acetylation of each sample was relativized according to the acetylation rates of control samples (considered as 1) that were on the same blot.

### Statistical analysis

Relative gene expression was analysed by REST 2009 software (Qiagen). REST2009 software uses adapted version of delta-delta Ct method, published by Pfaffl (2001) [29], which takes into account the different PCR efficiency of the gene of interest and reference genes. The relative difference between the control and each experimental group was calculated and tested for statistical significance by the integrated Bootstrap randomization test (2000 iterations) for  $p < 0.05$  confidence intervals.

Western blot data were analysed with a one-way ANOVA followed by Dunnett's post-hoc test and expressed as mean  $\pm$  SD (STATISTICA v13 software). Significant differences in comparison with the control were estimated with  $p < 0.05$  confidence intervals.

## Results

### Effect of spermidine on expression of genes related to autophagy and epigenetic modifications

Results of relative gene expression in abdomen and head of honey bees supplemented with spermidine at concentrations of 0.1 mM and 1 mM are presented in Table 1 (see also heatmap, S1 Fig). The results showed that both Spd concentrations increased the expression of all analysed genes in the abdomen of honey bees, with the exception of the *DNMT1B* isoform of DNA methyltransferase. In the head, however, only a lower Spd concentration (0.1 mM) caused an increase in the expression of two autophagy-related genes (*ATG9* and *ATG13*), as

**Table 1. Relative expression in the abdomen and the head of honey bees supplemented with spermidine at 0.1 mM (S0.1) and 1 mM (S1) concentrations for 17-day oral test.** The genes examined include: The autophagy-related (ATG) genes and genes of enzymes involved in epigenetic modifications of histones (HDACs—Histone deacetylases, KATs—Histone acetyltransferases) and DNA (DNA methyltransferases).

|                |                                          | S <sub>0.1</sub>    |              |       |    | S <sub>1</sub>      |             |       |    |
|----------------|------------------------------------------|---------------------|--------------|-------|----|---------------------|-------------|-------|----|
|                | gene                                     | Relative expression | SE rang      | p     |    | Relative expression | SE rang     | p     |    |
| <b>Abdomen</b> | <b>Autophagy-related genes (ATGs)</b>    |                     |              |       |    |                     |             |       |    |
|                | ATG3                                     | 2.336               | 1.673–2.683  | 0.004 | up | 2.462               | 2.042–3.334 | 0.001 | up |
|                | ATG5                                     | 2.926               | 2.012–3.960  | 0.022 | up | 3.278               | 2.574–4.191 | 0.016 | up |
|                | ATG9                                     | 5.681               | 3.868–9.317  | 0.012 | up | 4.378               | 3.837–5.001 | 0.008 | up |
|                | ATG13                                    | 3.411               | 2.854–3.987  | 0.009 | up | 2.744               | 2.302–3.354 | 0.006 | up |
|                | <b>Histone deacetylases (HDACs)</b>      |                     |              |       |    |                     |             |       |    |
|                | HDAC1                                    | 4.145               | 3.264–5.427  | 0.004 | up | 4.033               | 2.739–5.647 | 0.018 | up |
|                | HDAC3                                    | 3.659               | 2.819–4.847  | 0.030 | up | 2.809               | 2.007–3.866 | 0.014 | up |
|                | SIRT1                                    | 7.646               | 5.867–10.486 | 0.007 | up | 5.197               | 2.970–9.940 | 0.028 | up |
|                | <b>Histone acetyltransferases (KATs)</b> |                     |              |       |    |                     |             |       |    |
|                | P300                                     | 1.740               | 1.434–2.158  | 0.028 | up | 1.577               | 1.286–1.853 | 0.030 | up |
|                | KAT6B                                    | 1.225               | 1.078–1.329  | 0.004 | up | 1.224               | 1.095–1.369 | 0.025 | up |
|                | KAT2A                                    | 3.559               | 2.586–5.007  | 0.019 | up | 4.696               | 3.745–5.901 | 0.028 | up |
|                | <b>DNA methyltransferases (DNMTs)</b>    |                     |              |       |    |                     |             |       |    |
|                | DNMT1A                                   | 3.048               | 2.572–3.659  | 0.027 | up | 4.647               | 3.603–5.975 | 0.023 | up |
|                | DNMT1B                                   | 1.087               | 0.912–1.302  | 0.536 | -  | 0.831               | 0.671–0.998 | 0.115 | -  |
|                | DNMT3                                    | 2.257               | 1.360–3.151  | 0.003 | up | 1.572               | 1.224–2.049 | 0.015 | up |
| <b>Head</b>    | <b>Autophagy-related genes (ATGs)</b>    |                     |              |       |    |                     |             |       |    |
|                | ATG3                                     | 1.189               | 0.940–1.581  | 0.318 | -  | 1.099               | 0.779–1.478 | 0.487 | -  |
|                | ATG5                                     | 1.291               | 0.996–1.628  | 0.121 | -  | 1.094               | 0.827–1.342 | 0.529 | -  |
|                | ATG9                                     | 1.367               | 1.109–1.1693 | 0.040 | up | 0.967               | 0.866–1.084 | 0.592 | -  |
|                | ATG13                                    | 1.353               | 1.035–1.731  | 0.041 | up | 1.179               | 0.838–1.802 | 0.410 | -  |
|                | <b>Histone deacetylases (HDACs)</b>      |                     |              |       |    |                     |             |       |    |
|                | HDAC1                                    | 1.455               | 1.062–1.970  | 0.054 | -  | 0.985               | 0.681–1.375 | 0.877 | -  |
|                | HDAC3                                    | 1.299               | 1.094–1.529  | 0.001 | up | 1.049               | 0.718–1.511 | 0.820 | -  |
|                | SIRT1                                    | 5.008               | 3.506–6.660  | 0.021 | up | 1.341               | 0.821–2.017 | 0.354 | -  |
|                | <b>Histone acetyltransferases (HATs)</b> |                     |              |       |    |                     |             |       |    |
|                | P300                                     | 1.092               | 0.957–1.234  | 0.263 | -  | 0.928               | 0.775–1.136 | 0.503 | -  |
|                | KAT6B                                    | 1.069               | 0.923–1.323  | 0.597 | -  | 1.090               | 0.773–1.457 | 0.593 | -  |
|                | KAT2A                                    | 1.458               | 1.031–2.164  | 0.121 | -  | 0.972               | 0.604–1.580 | 0.080 | -  |
|                | <b>DNA methyltransferases (DNMTs)</b>    |                     |              |       |    |                     |             |       |    |
|                | DNMT1A                                   | 1.513               | 1.069–2.067  | 0.025 | up | 1.146               | 0.663–2.048 | 0.508 | -  |
|                | DNMT1B                                   | 1.010               | 0.873–1.224  | 0.977 | -  | 0.870               | 0.640–1.188 | 0.422 | -  |
|                | DNMT3                                    | 1.345               | 1.093–1.711  | 0.082 | -  | 1.156               | 0.951–1.384 | 0.220 | -  |

up—means overexpression for  $p < 0.05$  confidence intervals significant differences in comparison with control bees.

<https://doi.org/10.1371/journal.pone.0306430.t001>

well as two histone deacetylase isoforms (*HDAC3* and *SIRT1*) and one DNA methyltransferase isoform (*DNMT1A*). There were no significant changes in the expression of the examined genes in honey bee heads supplemented with 1 mM Spd.

## Western blot analysis of histone acetylation

The effect of spermidine supplementation on histone acetylation in honey bees at dosages of 0.1 mM and 1 mM was assessed by Western blot analyses using antibodies that specifically

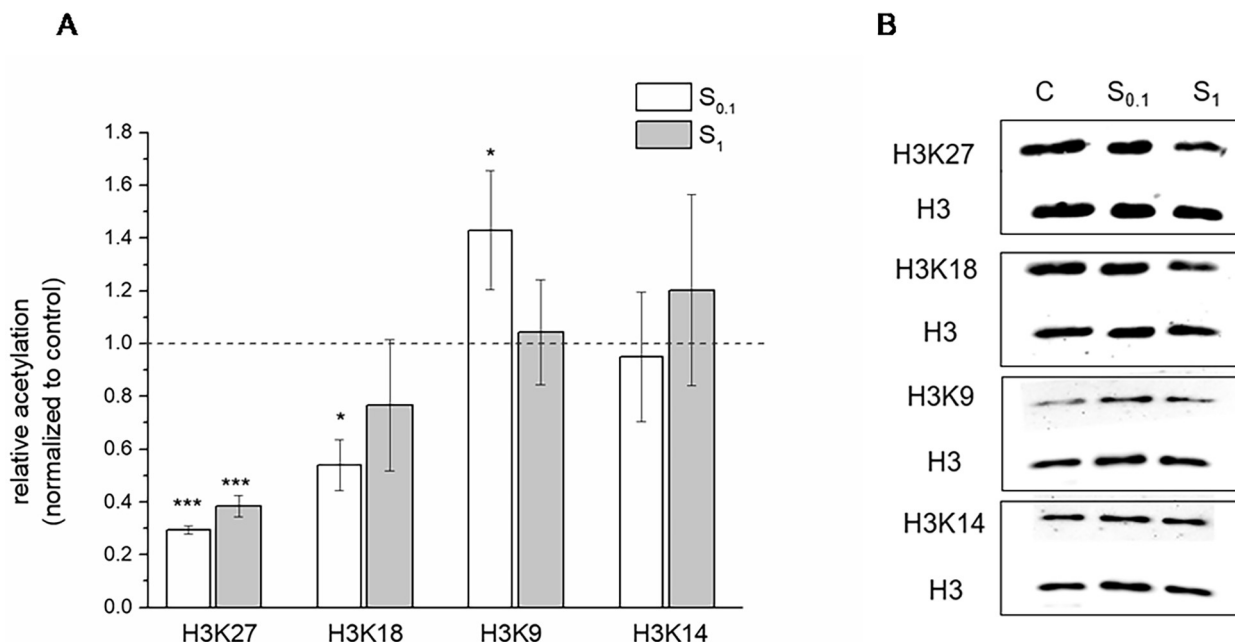

**Fig 1. Western blot analysis of histone 3 (H3) acetylation in honey bees supplemented with spermidine at 0.1 mM (S<sub>0.1</sub>) and 1 mM (S<sub>1</sub>) concentrations for 17-day oral test.** (A) Relative acetylation of H3 (normalized to control considered as 1) on indicated lysine residue determined by quantitative Western blot analysis. Results are shown as mean  $\pm$  SD ( $n = 3$ ). Statistical significance in comparison with the control was analysed with Dunnett's post-hoc test and represented with asterisk (\*\*\*)  $p < 0.001$ , (\*)  $p < 0.05$ . (B) Representative blots using site-specific antibodies. Normalization was always done with respect to the band intensity of H3 as a loading control on the same blot. The blots displayed in the figure were cropped; uncropped blots are included in [S1 Raw images](#).

<https://doi.org/10.1371/journal.pone.0306430.g001>

detect acetylation of lysine residues (K9, 14, 18, and 27) at the amino-terminal tail of histone H3 (Fig 1). The results showed hypoacetylation of H3 at position K27 for both tested concentrations, and at position K18 only for the lower concentration of Spd (0.1 mM). On the other hand, hyperacetylation of H3 at K9 for lower Spd concentration and no change in acetylation of H3 at K14 were obtained.

## Discussion

Previously has been shown that spermidine added at millimolar concentrations (particularly 0.1 and 1 mM) to food extended lifespan and improved oxidative status in honey bees [20]. As autophagy one of the more important geroprotective mechanisms of Spd [4,9,11], these findings prompted the present study to examination of the effects of those two Spd concentrations on the expression of ATG genes in honey bees. ATG proteins are the core of molecular machinery responsible for sequential activation of autophagy from the initial phagophore to final autolysosome formations [13]. We measured expression of *ATG3*, *5*, *9*, and *13*, involved in early phases of autophagy, and showed that both Spd concentrations, after 17 days, increased expression of all examined genes in the abdomen, but only the lower Spd concentration (0.1 mM) increased expression of *ATG9* and *ATG13* in the head. These results indicate that autophagy was triggered by Spd supplementation and that it was more intense in the abdomen of honey bees. The fact that worker honey bees have major fat body tissue in the abdomen, which is comparable in function to vertebrates' white adipose tissue and liver [30], could explain increased abdomen sensitivity. It is important to mention that the midgut, a metabolically active tissue, is located in the abdomen as well. The midgut of honey bees is responsible for digestion and nutrient absorption, and in the case of oral supplementation, this



is the first gateway for gradients. In regard to that, recorded changes could be attributed to the midgut too. Obtained increased expression of ATGs is in accordance with the study by Eisenberg et al. [9], who obtained up-regulation of *ATG7*, *11*, and *15* in yeast, as well as *ATG8* in human cells, flies, and *C.elegans* after Spd treatment. The authors of the same study concluded that autophagy is critical for Spd effects because mutations in some *ATG* genes abrogated Spd-mediated life extension in treated species.

Even though the comprehensive molecular targets of Spd are still incompletely understood, there are indications that some actors are implicated in epigenetic modulations [12,16,18,31,32]. It was suggested that Spd effects are most likely associated with general histone H3 deacetylation that lead to epigenetic reprogramming of the transcriptome and induction of autophagy in yeast and human cells [9,11].

In accordance with the previous statement, the gene expression of selected enzymes involved in histone modifications that could be related to autophagy in supplemented honey bees, such as histone deacetylases (*HDACs*) and histone acetyltransferases (*KATs*) were measured. It has been found that gene expression for *HDAC1*, *HDAC3*, and *SIRT1* was up-regulated in the abdomen. Among them, the most interesting is *SIRT1*, which was the most up-regulated not only in the abdomen but also in the head of honey bees. Even though it was shown that Spd stimulates autophagy independently of *SIRT1* in yeast and worms [10,33], these findings lead to proposal that *SIRT1* may stimulate autophagy in honey bees. Recent studies revealed *SIRT1* as a longevity factor and its importance in the regulation of the formation of autophagosomes [34]. *SIRT1* is a member of the sirtuin family of NAD<sup>+</sup>-dependent histone/protein deacetylases (*HDACs*) and acts as a sensor of nutrient availability. *SIRT1* can induce autophagy either directly by deacetylating essential autophagic modulators, such as *ATG5*, *ATG7*, and *ATG8/LC3*, or indirectly through a downstream signalling network by deacetylating several transcription factors, such as FoxO proteins, p53, and the p65 component of NF- $\kappa$ B complex [35]. Additional investigations found that Spd induced up-regulation of *SIRT1* and implications for *SIRT1*-related biological responses in rat and human culture cells, but in those studies, autophagy was not further characterized [16,36,37].

In addition to *HDAC* activity, *KATs* also control the histone acetylation landscape. Spd was described as an inhibitor of acetyltransferase activity of the recombinant EP300 protein (E1A-binding protein p300) *in vitro*, and many authors consider that this could be the reason for the H3 hypoacetylation and autophagy induction associated with Spd [9]. The results of the present study showed increased gene expression for *KAT2A*, *KAT6B*, and *P300* in the abdomen but not in the head following Spd treatment. On the other hand, hypoacetylation of H3 at positions K18 and K27, hyperacetylation at K9, and no change in acetylation of K14 was observed. Hypoacetylation at H3K18 and H3K27 is in line with the results of the study by Jin et al. [38], which obtained a reduction of histone acetylation on H3K18 and H3K27 (H3K18/27ac) by deletion of EP300. However, Eisenberg et al. [9] obtained induction of hypoacetylation of H3 at positions K9, 14, and 18 in yeast, as well as at K14 and 18 in human culture cells and hepatocytes from mice fed with Spd. These results confirm the assumed complexity of Spd action on epigenetic and, consequently, autophagy regulation at different levels of gene expression and require additional analyses. Obtained hyperacetylation of H3 at K9 in honey bees could be in relation to up-regulation of *KAT2A/2B*, which particularly modified H3 in that position [39].

In the present study, the expression of three DNA methyltransferases in honey bees treated with Spd was also assessed. Up-regulation of *DNMT1A* and *DNMT3* in the abdomen and only *DNMT1A* in the head was observed. DNA methyltransferases are key epigenetic enzymes that regulate gene expression through DNA methylation. Many studies have shown that alterations in DNA methylation status have a significant impact on longevity and age-related diseases [30]. Mostly, there is a genome-wide decline in DNA methylation with aging [40]. Recent

studies indicated that changes in polyamine metabolism affect the concentrations of substances and enzyme activities involved in DNA methylation due to relationship between polyamine metabolism and DNA methylation (reviewed in [31]). The results of present study are in line with this observation. It has been shown before that Spd supplementation prolonged lifespan and increased endogenous Spd levels in honey bees [20], and here was demonstrated up-regulation of *DNMT* genes. On the other hand, Cardoso-Júnior et al. [41] showed that *DNMTs* expression is positively associated with age in the abdomen of honey bees. More accurately, they measured that *DNMT1A* and *DNMT3* expressions were up-regulated in the abdomens, whereas *DNMT1B* and *DNMT2* were down-regulated in the heads of old workers. Further, they showed that treatment of newly emerged honey bee workers with the *DNMT* inhibitor (RG108) increased lifespan, and probably genomic DNA methylation status, indirectly affecting the expression of vitellogenin as an aging-related gene. These results seem to be in contrast with the results of present study and with the general opinion that aging is associated with global DNA hypomethylation and site-specific hypermethylation [42,43]; however, the mechanisms underlying age-related DNA methylation changes remain mostly undiscovered [44].

In conclusion, the findings of present study show that supplementing spermidine at levels favourable to increasing honey bee lifespan generates profound epigenetic changes and promotes expression of autophagy related genes. It should be also noted that the findings in this study have a limited broad due to the use of workers with similar genomes from the single colony. More research is needed to determine the precise mechanism of spermidine activity and to establish a clearer link between epigenetic alterations and consequently to autophagy induction in honey bees. Nonetheless, these findings show that spermidine most likely triggers autophagy, which may be an important geroprotective mechanism in honey bees as well.

## Supporting information

**S1 Fig. Heatmap illustrating gene expressions in honey bees supplemented with spermidine.**

(DOCX)

**S1 Table. List of primers used for quantitative PCR.**

(DOC)

**S2 Table. List of antibodies with dilutions used for Western blot analysis.**

(DOCX)

**S1 Raw images. Uncropped blots used in Fig 1.**

(PDF)

## Acknowledgments

The authors would like to thank Nikola Krivokuća for his assistance in laboratory works.

## Author Contributions

**Conceptualization:** Danijela Kojić, Jelena Purać.

**Data curation:** Danijela Kojić.

**Formal analysis:** Danijela Kojić, Jelena Spremo, Srđana Đordievski, Tatjana Čelić.

**Investigation:** Jelena Spremo, Srđana Đordievski, Elvira Vukašinović, Jelena Purać.



**Methodology:** Danijela Kojić, Tatjana Čelić, Elvira Vukašinović.

**Project administration:** Jelena Purać.

**Resources:** Ivan Pihler.

**Validation:** Danijela Kojić, Tatjana Čelić, Jelena Purać.

**Visualization:** Jelena Spremo, Srđana Đordjević.

**Writing – original draft:** Danijela Kojić, Jelena Purać.

**Writing – review & editing:** Danijela Kojić, Jelena Purać.

## References

1. Pegg AE. 2009 Mammalian polyamine metabolism and function. *IUBMB Life* 61, 880–894. <https://doi.org/10.1002/iub.230> PMID: 19603518
2. Minois N, Carmona-Gutierrez D, Madeo F. 2011 Polyamines in aging and disease. *Aging (Albany, NY)* 3, 716–732. <https://doi.org/10.18632/aging.100361> PMID: 21869457
3. Minois N, Carmona-Gutierrez D, Bauer MA, Rockenfeller P, Eisenberg T, Brandhorst S, et al. 2012 Spermidine promotes stress resistance in *Drosophila melanogaster* through autophagy-dependent and -independent pathways. *Cell Death Dis.* 3, e401–e401. <https://doi.org/10.1038/cddis.2012.139> PMID: 23059820
4. Madeo F, Eisenberg T, Pietrocola F, Kroemer G. 2018 Spermidine in health and disease. *Science* 359. <https://doi.org/10.1126/science.aan2788> PMID: 29371440
5. Childs AC, Mehta DJ, Gerner EW. 2003 Polyamine-dependent gene expression. *Cell. Mol. Life Sci.* 60, 1394–1406. <https://doi.org/10.1007/s00018-003-2332-4> PMID: 12943227
6. Miller-Fleming L, Olin-Sandoval V, Campbell K, Ralser M. 2015 Remaining Mysteries of Molecular Biology: The Role of Polyamines in the Cell. *J. Mol. Biol.* 427, 3389–3406. <https://doi.org/10.1016/j.jmb.2015.06.020> PMID: 26156863
7. Soda K, Kano Y, Sakuragi M, Takao K, Lefor A, Konishi F. 2009 Long-Term Oral Polyamine Intake Increases Blood Polyamine Concentrations. *J. Nutr. Sci. Vitaminol. (Tokyo)* 55, 361–366. <https://doi.org/10.3177/jnsv.55.361> PMID: 19763038
8. Soda K, Dobashi Y, Kano Y, Tsujinaka S, Konishi F. 2009 Polyamine-rich food decreases age-associated pathology and mortality in aged mice. *Exp. Gerontol.* 44, 727–732. <https://doi.org/10.1016/j.exger.2009.08.013> PMID: 19735716
9. Eisenberg T et al. 2009 Induction of autophagy by spermidine promotes longevity. *Nat. Cell Biol.* 11, 1305–1314. <https://doi.org/10.1038/ncb1975> PMID: 19801973
10. Hofer SJ, Simon AK, Bergmann M, Eisenberg T, Kroemer G, Madeo F. 2022 Mechanisms of spermidine-induced autophagy and geroprotection. *Nat. Aging* 2, 1112–1129. <https://doi.org/10.1038/s43587-022-00322-9> PMID: 37118547
11. Madeo F, Eisenberg T, Büttner S, Ruckenstein C, Kroemer G. 2010 Spermidine: A novel autophagy inducer and longevity elixir. *Autophagy* 6, 160–162. <https://doi.org/10.4161/auto.6.1.10600> PMID: 20110777
12. Pietrocola F et al. 2015 Spermidine induces autophagy by inhibiting the acetyltransferase EP300. *Cell Death Differ.* 22, 509–516. <https://doi.org/10.1038/cdd.2014.215> PMID: 25526088
13. Parzych KR, Klionsky DJ. 2014 An Overview of Autophagy: Morphology, Mechanism, and Regulation. *Antioxid. Redox Signal.* 20, 460–473. <https://doi.org/10.1089/ars.2013.5371> PMID: 23725295
14. He C, Klionsky DJ. 2009 Regulation Mechanisms and Signaling Pathways of Autophagy. *Annu. Rev. Genet.* 43, 67–93. <https://doi.org/10.1146/annurev-genet-102808-114910> PMID: 19653858
15. Rubinsztein DC, Mariño G, Kroemer G. 2011 Autophagy and Aging. *Cell* 146, 682–695. <https://doi.org/10.1016/j.cell.2011.07.030> PMID: 21884931
16. Park IH, Kim MM. 2012 Spermidine inhibits MMP-2 via modulation of histone acetyltransferase and histone deacetylase in HDFs. *Int. J. Biol. Macromol.* 51, 1003–1007. <https://doi.org/10.1016/j.ijbiomac.2012.08.013> PMID: 22925630
17. Zhang J et al. 2018 Importance of TFEB acetylation in control of its transcriptional activity and lysosomal function in response to histone deacetylase inhibitors. *Autophagy*, 1–17. <https://doi.org/10.1080/15548627.2018.1447290> PMID: 30059277

18. Liu L, McKeehan WL, Zhang J, Xie R. 2012 MAP1S enhances autophagy to suppress tumorigenesis. *Autophagy* 8, 278–280. <https://doi.org/10.4161/auto.8.2.18939> PMID: 22301994
19. Soda K, Kano Y, Chiba F, Koizumi K, Miyaki Y. 2013 Increased Polyamine Intake Inhibits Age-Associated Alteration in Global DNA Methylation and 1,2-Dimethylhydrazine-Induced Tumorigenesis. *PLoS One* 8, e64357. <https://doi.org/10.1371/journal.pone.0064357> PMID: 23696883
20. ordjević S, Vukašinović EL, Čelić T V., Pihler I, Kebert M, Kojić D, et al 2023 Spermidine dietary supplementation and polyamines level in reference to survival and lifespan of honey bees. *Sci. Rep.* 13, 4329. <https://doi.org/10.1038/s41598-023-31456-4> PMID: 36922548
21. Münch D, Amdam G V. 2010 The curious case of aging plasticity in honey bees. *FEBS Lett.* 584, 2496–2503. <https://doi.org/10.1016/j.febslet.2010.04.007> PMID: 20385132
22. ordjević S, Čelić T V., Vukašinović EL, Kojić D, Purać J 2022 Epigenetic Changes in Eusocial Insects which affect Age and Longevity. *Curr.Sc.i* 123, 154. <https://doi.org/10.18520/cs/v123/i2/154-159>
23. Potts SG, Biesmeijer JC, Kremen C, Neumann P, Schweiger O, Kunin WE. 2010 Global pollinator declines: trends, impacts and drivers. *Trends Ecol. Evol.* 25, 345–353. <https://doi.org/10.1016/j.tree.2010.01.007> PMID: 20188434
24. FAO. 2021 *Good beekeeping practices for sustainable apiculture*. FAO, IZSLT, Apimondia and CAAS. <https://doi.org/10.4060/cb5353en>
25. Lourenço AP, Mackert A, dos Santos Cristino A, Simões ZLP. 2008 Validation of reference genes for gene expression studies in the honey bee, *Apis mellifera*, by quantitative real-time RT-PCR. *Apidologie* 39, 372–385. <https://doi.org/10.1051/apido:2008015>
26. Bradford MM. 1976 A rapid and sensitive method for the quantitation of microgram quantities of protein utilizing the principle of protein-dye binding. *Anal. Biochem.* 72, 248–254. <https://doi.org/10.1006/abio.1976.9999> PMID: 942051
27. Laemmli UK. 1970. Cleavage of structural proteins during the assembly of the head of bacteriophage T4. *Nature.* 227(5259):680–5. <https://doi.org/10.1038/227680a0> PMID: 5432063
28. Schneider CA, Rasband WS, Eliceiri KW. 2012 NIH Image to ImageJ: 25 years of image analysis. *Nat. Methods* 9, 671–675. <https://doi.org/10.1038/nmeth.2089> PMID: 22930834
29. Pfaffl MW. 2001. A new mathematical model for relative quantification in real-time RT-PCR. *Nucleic Acids Res.* 29(9):e45. <https://doi.org/10.1093/nar/29.9.e45> PMID: 11328886
30. Snodgrass RE. 1956 *Anatomy of the Honey Bee*. Cornell University Press. <https://doi.org/10.7591/9781501717925>
31. Soda K. 2020 Spermine and gene methylation: a mechanism of lifespan extension induced by polyamine-rich diet. *Amino Acids* 52, 213–224. <https://doi.org/10.1007/s00726-019-02733-2> PMID: 31004229
32. Sakamoto A, Terui Y, Uemura T, Igarashi K, Kashiwagi K. 2020 Polyamines regulate gene expression by stimulating translation of histone acetyltransferase mRNAs. *J. Biol. Chem.* 295, 8736–8745. <https://doi.org/10.1074/jbc.RA120.013833> PMID: 32376690
33. Morselli E et al. 2011 Spermidine and resveratrol induce autophagy by distinct pathways converging on the acetylproteome. *J. Cell Biol.* 192, 615–629. <https://doi.org/10.1083/jcb.201008167> PMID: 21339330
34. Salminen A, Kaarniranta K. 2009 SIRT1: Regulation of longevity via autophagy. *Cell. Signal.* 21, 1356–1360. <https://doi.org/10.1016/j.cellsig.2009.02.014> PMID: 19249351
35. Lee IH, Cao L, Mostoslavsky R, Lombard DB, Liu J, Bruns NE, et al. 2008 A role for the NAD-dependent deacetylase Sirt1 in the regulation of autophagy. *Proc. Natl. Acad. Sci.* 105, 3374–3379. <https://doi.org/10.1073/pnas.0712145105> PMID: 18296641
36. Liu X et al. 2021 Spermidine inhibits vascular calcification in chronic kidney disease through modulation of SIRT1 signaling pathway. *Aging Cell* 20. <https://doi.org/10.1111/ace.13377> PMID: 33969611
37. Wang J et al. 2020 Spermidine alleviates cardiac aging by improving mitochondrial biogenesis and function. *Aging (Albany, NY).* 12, 650–671. <https://doi.org/10.18632/aging.102647> PMID: 31907336
38. Jin Q et al. 2011 Distinct roles of GCN5/PCAF-mediated H3K9ac and CBP/p300-mediated H3K18/27ac in nuclear receptor transactivation. *EMBO J.* 30, 249–262. <https://doi.org/10.1038/emboj.2010.318> PMID: 21131905
39. Fournier M et al. 2016 KAT2A/KAT2B-targeted acetylome reveals a role for PLK4 acetylation in preventing centrosome amplification. *Nat. Commun.* 7, 13227. <https://doi.org/10.1038/ncomms13227> PMID: 27796307
40. Horvath S, Zhang Y, Langfelder P, Kahn RS, Boks MP, van Eijk K, et al. 2012 Aging effects on DNA methylation modules in human brain and blood tissue. *Genome Biol.* 13, R97. <https://doi.org/10.1186/gb-2012-13-10-r97> PMID: 23034122

41. Cardoso-Júnior CAM, Guidugli-Lazzarini KR, Hartfelder K. 2018 DNA methylation affects the lifespan of honey bee (*Apis mellifera* L.) workers—Evidence for a regulatory module that involves vitellogenin expression but is independent of juvenile hormone function. *Insect Biochem. Mol. Biol.* 92, 21–29. <https://doi.org/10.1016/j.ibmb.2017.11.005> PMID: 29157677
42. Zampieri M, Ciccarone F, Calabrese R, Franceschi C, Bürkle A, Caiafa P. 2015 Reconfiguration of DNA methylation in aging. *Mech. Ageing Dev.* 151, 60–70. <https://doi.org/10.1016/j.mad.2015.02.002> PMID: 25708826
43. Xiao Q et al. 2016 Cancer-Associated Fibroblasts in Pancreatic Cancer Are Reprogrammed by Tumor-Induced Alterations in Genomic DNA Methylation. *Cancer Res.* 76, 5395–5404. <https://doi.org/10.1158/0008-5472.CAN-15-3264> PMID: 27496707
44. Ciccarone F, Tagliatesta S, Caiafa P, Zampieri M. 2018 DNA methylation dynamics in aging: how far are we from understanding the mechanisms? *Mech. Ageing Dev.* 174, 3–17. <https://doi.org/10.1016/j.mad.2017.12.002> PMID: 29268958
